# Supplementary material
Source: PubMed Central journal article supplement (PMC2568993)
Supplement: NIHMS51059-supplement-1124981.pdf [file NIHMS51059-supplement-1124981.pdf]

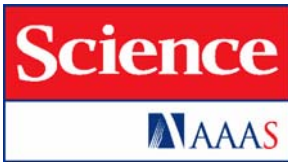

## Supporting Online Material for

### Checkpoint Proteins Control Survival of the Postmitotic Cells in *Caenorhabditis elegans*

Anders Olsen, Maithili C. Vantipalli, Gordon J. Lithgow\*

\*To whom correspondence should be addressed. E-mail: [glithgow@buckinstitute.org](mailto:glithgow@buckinstitute.org)

Published 2 June 2006, *Science* **312**, 1381 (2006).

DOI: 10.1126/science.1124981

#### **This PDF file includes**

Materials and Methods

Figs. S1 to S4

Tables S1 to S3

References

## Materials and Methods

### *C. elegans* strains and culturing

All nematodes were cultured using standard *C. elegans* methods as described by Brenner (S1). We thank Ronald Plasterk for the strain NL917 *mut-7(pk720)* and Cynthia Kenyon for the strain *daf-16(mu86)*. N2, DA1113 *eat-2(ad1113)*, DR20 *daf-12(m20)*, RB647 *cdc-25.3(ok358)*, MR142 *cdc-25.1(rr31) l; rrls*, SJ4005 *zcls4(hsp-4::GFP)*, CL2070 *dvls70(hsp-16.2::gfp; rol-6(su1006))*, CF1553 *muls84((pAD76(sod-3::GFP))* and NL2099 *rff-3(pk1426)* were obtained from the *Caenorhabditis* Genetics Center (CGC) in Minneapolis. The strains GL302 *cid-1(rf34::Tc4)*, GL303 *cid-1(rf34::Tc4)*, and GL304 *cid-1(rf34::Tc4)* were generated by backcrossing (2x) the mutant isolated from the mutator strain NL917 *mut-7(pk720)*. GL305 *cid-1(+/+)* and GL305 *cid-1(+/+)* are control strains with wild-type *cid-1* generated by backcrossing (2x) the mutant isolated from the mutator strain NL917 *mut-7(pk720)*. Worms were cultured at 20°C or 25°C as indicated. The strain GL310 was generated by crossing MR142 *cdc-25.1(rr31) l; rrls* to wild-type N2 and selecting for progeny displaying no extra intestinal cells. We found no effect of the insertion on thermotolerance. GL311 and GL312 were generated by backcrossing RB647 *cdc-25.3(ok358)* once. GL313 and GL314 were generated by backcrossing RB647 *cdc-25.3(ok358)* twice. GL312 and GL313 are control strains with wild-type *cdc-25.3*.

### Isolation and identification of the *cid-1* mutation

A number of previous publications have shown that selection for stress resistance yields mutants with extended life span (S2, S3). The transposon screen was performed by screening 1.5 million L1 larvae from the mutator strain NL917 *mut-7(pk720)* for their ability to survive a heat stress at 35°C and exposure to lethal doses (40 mM) of hydrogen peroxide. Transposons were displayed using the Vectorette protocol. Lines established following two backcrosses were analyzed and the band co-segregating with the intrinsic thermotolerance (*Itt*) phenotype identified. The *Itt* phenotype assorted as a recessive trait. The position of the transposon was identified by sequencing of the flanking regions. Genetically stable lines were selected via allelic specific PCR of the *mut-7* gene. Sequencing of the flanking DNA followed by Blast analysis revealed the identity of the mutated gene.

### Thermotolerance and life-span assays

Longitudinal thermotolerance assays were performed as described (S4). Briefly, synchronous 4- or 5-day-old adults were shifted from their normal growth temperature to 35°C and survival scored as indicated by means of touch provoked movement. Worms not responding to touch were scored as dead. In figures each point represents surviving fraction  $\pm$  SEM. For each strain the results shown were obtained from two plates each with approximately 25 worms. In drug treatment experiments automated longitudinal thermotolerance assays were performed as described previously (S5). Life-span analysis assays were performed as described (S4). During the reproductive period worms were

transferred to fresh plates every day to maintain synchrony. After the fertile period worms were transferred to fresh plates every 3 to 5 days. Survival was scored by means of touch provoked movement and pumping of the pharynx. In the RNAi experiments the plates used were spotted with the feeding bacteria no more than 4 days prior to use. Controls were fed bacteria containing an empty vector. Survival data were analysed using the GraphPad Prism version 2, GraphPad Software Inc., San Diego Ca. Maximum life span was defined as the mean life span of the longest lived 20% of the cohort. A two-tailed t-test was used to determine significance between groups.

### Generation of transgenic animals

A *cid-1::gfp* reporter construct was generated using a PCR fusion protocol (S6). A 2.5 kb region upstream of the K10D2.3 open reading frame was included. The cosmid K10D2 and the Fire vector pPD95.75 were used as templates for amplifying *cid-1* and GFP fragments, respectively. The following primers were used: Primer A 5'-TTGCCTCACTAAGACCTTGTTGAT-3', Primer A\* 5'-CTTCTCTAGCAGCGGTCAATTCT-3', Primer B 5'-AGTCGACCTGCAGGCATGCAAGCTTTTGTGTTGTACGAGCGATGATAGTATGT-3', Primer C 5'-AGCTTGCATGCCTGCAGGTGCGACT-3', Primer D 5'-AAGGGCCCGTACGGCCGACTAGTAGG-3', and Primer D\* 5'-GGAAACAGTTATGTTTGGTATATTGGG-3'. Transgenic worms were generated by microinjecting wild-type N2 worms with the reporter construct.

### RNA interference

Inactivation of gene function using RNAi was performed as described by Timmons *et al.* (S7). The primers used were *cid-1f*: 5'-TCCAAAATGCCGGGTCA-3', *cid-1r*: 5'-TGGGAACGCTTCTAGACGATC-3', *chk-1f*: 5'-CAGAAACGTGTGTCCGCTGT-3', *chk-1r*: 5'-TCGCAATGAGCACAATCCC-3', *cdc-25f*: 5'-GGAGAAACCAGTCATCGCGA-3' and *cdc-25r*: 5'-AGTCGAAACGGAGACCTGCA-3'. The fragments used to RNAi inactivate K10D2.3 (*cid-1*), Y39H10A.7 (*chk-1*) and K06A5.7 (*cdc-25.1*) were amplified using primer sets *cid-1f/cid-r*, *chk-1f/chk-1r* and *cdc-25f/cdc-25r*, respectively. The PCR amplified fragments were cloned into the TOPO pCR<sup>®</sup>2.1 vector and sequenced. The Not1/BamH1 fragments were sub-cloned into the pL4440 vector and plasmids were amplified in DH-5 $\alpha$  cells. The RNAi bacteria feeding strain HT115 were transformed with Qiagen purified plasmids. Eggs were placed on agar plates (100  $\mu$ g/mL ampicillin and 12.5  $\mu$ g/mL tetracycline) spotted with the feeding bacteria. The phenotypes described were observed in the progeny generation. Control animals were fed bacteria carrying an empty L4440 construct. Identical phenotypes were observed using our RNAi constructs or when using the clones K10D2.3 and K06A5.7 from the RNAi library provided by Dr. Julie Ahringer and the MRC gene service following their protocol. Stronger phenotypes were often observed when using the RNAi sensitive strain *rrf-3(pk1426)* (S8).

**Hydroxy urea resistance**

Resistance to hydroxy urea (HU) was measured by letting worms develop on plates (3 cm) spotted with 60  $\mu$ L HU (30.7 mg/mL) dissolved in M9 buffer. Eggs were placed on HU plates, and after 4 days, the developmental stage of the hatched worms was scored.

**DNA staining**

DNA was stained with 4'-6-diamidino-2-phenylindole (DAPI). Gonad dissections were performed after worms were paralyzed in 0.2 mM levamisole. The dissected gonads or whole animals were fixed with ice-cold methanol for 5 min before mounted on slides in mounting buffer containing DAPI.

**UCN-01 treatment**

The kinase inhibitor UCN-01 was dissolved in dimethylsulfoxide (DMSO) and spotted on top of the normal agar plates at the concentrations indicated. Control plates were spotted with DMSO only. Four-day-old adult worms were placed on the drug plates for 24 h before the effect of the drug treatment was assessed in longitudinal thermotolerance assays.

**Fig. S1.**

**A**

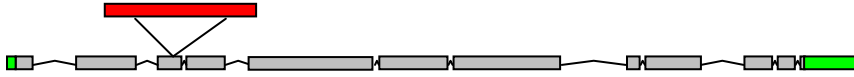

**B**

|               |             |             |             |            |             |
|---------------|-------------|-------------|-------------|------------|-------------|
| 701           |             |             |             | 750        |             |
| elegans_cid-1 | QEPVYEIVND  | KDHLKYMKEL  | KERLMIDGIL  | VNERKPIDYH | TDDHRECVYG  |
| human_cid1    | ~~~~~       | ~~~~~       | ~~~~~M      | GNEH..ISVH | .PENSDCIQA  |
| yeast_cid1    | ~~~~~       | ~~~~~       | ~~~~~       | ~~~~~      | ~~~~~       |
|               | 751         |             |             |            | 800         |
| elegans_cid-1 | RNSLLRFK..  | RVLKPGLNK   | MAASMDGLSF  | VTKKGGKFIN | .RWKKANVII  |
| human_cid1    | DVNSDDYKGD  | KVYHPETGRK  | NEKEKVGFL   | .TRKGKHLIT | VDQKRGEHVV  |
| yeast_cid1    | ~~~~~       | ~~~~~       | ~~~~~       | ~~~~~      | ~~~~~       |
|               | 801         |             |             |            | 850         |
| elegans_cid-1 | LSSEDSSEIDE | KTKAADS NVS | EIAEKLEETL  | KISSQKNIDV | AVTSMPVSTE  |
| human_cid1    | CGSTRNNESE  | STLDLEGFQN  | PTAKECEGLA  | TLDNKADLDG | EFTSTEGTEE  |
| yeast_cid1    | ~~~~~       | ~~~~~       | ~~~~~       | ~~~~~      | ~~~~~       |
|               | 851         |             |             |            | 900         |
| elegans_cid-1 | IKP..EPIT.  | KLSNEAFVVKI | KNVAQPQCDL  | IEAPQES... | LMN....ES   |
| human_cid1    | LEDSLNHFTH  | SVQGQTSSEMI | PSDEEEEDDE  | EEEEEEEPRL | TINQREDEDG  |
| yeast_cid1    | ~~~~~       | ~~~~~       | ~~~~~       | ~~~~~      | ~~~~~       |
|               | 901         |             |             |            | 950         |
| elegans_cid-1 | MMESSFDETE  | SPMKTPIVQK  | EV.KQNATFG  | KST.ISTVIP | DKQFCSEEFF  |
| human_cid1    | MAFTNEDEL   | NTYTSGDED   | ALSEEDDELG  | EAAKYEDVKE | CGKIVERALL  |
| yeast_cid1    | ~~~~~       | ~~~~~       | ~~~~~       | ~~~~~      | ~~~~~       |
|               | 951         |             |             |            | 1000        |
| elegans_cid-1 | IKLNS.NLKD  | ....IVSKS   | KSLKPSDFHY  | EFSTDLFCGD | FEMEMKCTHC  |
| human_cid1    | VELNKISLKE  | ENVFTCEEKN  | SPVDQSDFFY  | EFSKLIFTKC | KSPTVVCSLC  |
| yeast_cid1    | ~~~~~       | ~~~~~       | ~~~~~       | ~~~~~      | ~~MNISSAQF  |
|               | 1001        |             |             |            | 1050        |
| elegans_cid-1 | D.GSHCVENC  | .P...MMEI   | EPIKKYQART  | PEDLKDIDDM | IDKYYHE...  |
| human_cid1    | KREGHLKKDC  | .PEDFKRIQL  | EPLPPF.TLT  | PKFLNILDQV | CIQCYKDFSP  |
| yeast_cid1    | IPGVHTVEEI  | EAEIHKNLHI  | SKSCSYQ.KV  | PNSHKEFTKF | CYEVYNEIK.  |
|               | 1051        |             |             |            | 1100        |
| elegans_cid-1 | NILDERRLKM  | LDHKIDELQS  | FLRKNYREDV  | TLTTFGSVMT | GLSVNC..SD  |
| human_cid1    | TIIED...QA  | REHIRQNLES  | FIRQDF.PGT  | KLSLFGSSKN | GFTPGFKQSD  |
| yeast_cid1    | ..ISDKEFKE  | KRAALDTLRL  | CLKR.ISPDA  | ELVAFGSLES | GLAL..KNSD  |
|               | 1101        |             |             |            | 1150        |
| elegans_cid-1 | IDICLRFQDG  | DVPPKDLTAK  | EVIQKTESVL  | RKCHLVKRVQ | AIVTAKVPVIV |
| human_cid1    | LDVCMTI.NG  | LETAEGLDCV  | RTIEELARVL  | RKHSGLRNIL | PIITAKVPVIV |
| yeast_cid1    | MDLCVLMDSR  | VQ...SDTIAL | QFYEELIAEG  | FEGKFLQR.. | ....ARIPII  |
|               | 1151        |             |             |            | 1200        |
| elegans_cid-1 | K.FQ.VKLSN  | GAIIDVDISY  | YNILAIYNNTA | LLKEYSLWTP | DKRFPAKLALF |
| human_cid1    | KFFF.THLRS  | G..LEVDISL  | YNTLALHNTR  | LLSAYS..AI | DERVKYLCYT  |
| yeast_cid1    | KLTSDTKNGF  | GASFQCDIGF  | NNRLAIHNNTL | LLSSYT..KL | DARLKPMLL   |
|               | 1201        |             |             |            | 1250        |

```

elegans_cid-1 VKWAKNCEI GDASRGSL S. .SYCHVIMLI SYL.QNCDPP VLPRLQEDFR
human_cid1 MKVFTKMC DI GDASRGSLSF TSYAYTLMVL YFL.QQRNPP VIPVLQEIYK
yeast_cid1 VKHWAKRKQI NSFYFGTLS. .SYGYVLMVL YYLIHVIKPP VFPNL...LL

1251 1300
elegans_cid-1 SDNRERRLVD NWDTSFAQVE TSLLRW... ..PKNKESCA QLLIGYFDYY
human_cid1 GEKKPEIFVD GWNIYFFDQI DELPTYWSEC GFTKNTESVG QLWLGLLRFY
yeast_cid1 SPLKQEKIVD GFDVCFDDKL EDIPP..... ..SQNYSSLG SLLHGFFRFY

1301 1350
elegans_cid-1 S.RFDFRN FV VQCRRE.MIL SKMEKEW.P. .... RP.LC VE
human_cid1 TEEFDFKEHV ISIRR.KSLL TTFKKQWTS. .... KY.IVIE
yeast_cid1 AYKFEPREKV VTFRRPDGYL TKQEKGWTS TEHTGSADQI IKDRYILAIE

1351 1400
elegans_cid-1 DPFDL SHN... ..LSSGVNK KMFV FIMKVF INSRVFMSE KPPMNRDHTF
human_cid1 DPFDLNHN F. ..TLGAGLSR KMTNFIMKAF INGRRVFGIP VKGF PKDYPS
yeast_cid1 DPFEISHNVG RTVSSSGLYR IRGEFMAASR LLNSRSYPIP YDSLFE EAPI

1401 1450
elegans_cid-1 LSSYQHQLLR KCNQGSAPTD R..QCHQCHR IGHFVESCPO RALAKEARKR
human_cid1 KMEYFFDE DV LTEGELAPND RCFTCRICGK IGHFMKDCPM R..RKVRRRR
yeast_cid1 PRRQKKTDE QSNKLLNET DGDNSE~~~~ ~~~~~~ ~~~~~~

1451 1493
elegans_cid-1 FGSNSTNS SY RENDSGRGFK NGEEGDRLT YHKRTYYHRS YNK
human_cid1 DQEDALNORY PE~~~~~ ~~~~~~ ~~~~~~ ~~~~~~
yeast_cid1 ~~~~~~ ~~~~~~ ~~~~~~ ~~~~~~

```

**Fig. S1. The K10D2.3 gene encodes a protein homologous to caffeine induced death protein-1. (A)** Gene model of *cid-1* (K10D2.3). The position of the 3.4 kb Tc4 transposon insertion *cid-1(rf34::Tc4)* is indicated (red box, not drawn to scale). **(B)** Pileup multiple alignment of *C. elegans* CID-1 (SWISS-PROT accession # Q09409), *S. Pombe* spCid1 (SWALL (SPTR) accession # 013833) and a human homolog (EMBL accession # AK055948) identified in the NEDO human cDNA sequencing project. ClustalW colour codes were used. Identical amino acids are marked in blue. Red indicates that more than half of the amino acids of a column are identical or belong to a group of amino acids with strong similarities. Orange indicates that more than half of the amino acids of a column belong to a group of amino acids with weak similarities. Numbers refer to the *C. elegans* CID-1. The PAP domains are found at amino acids 574 to 626 (not shown) and 1245 to 1296.

**Fig. S2.**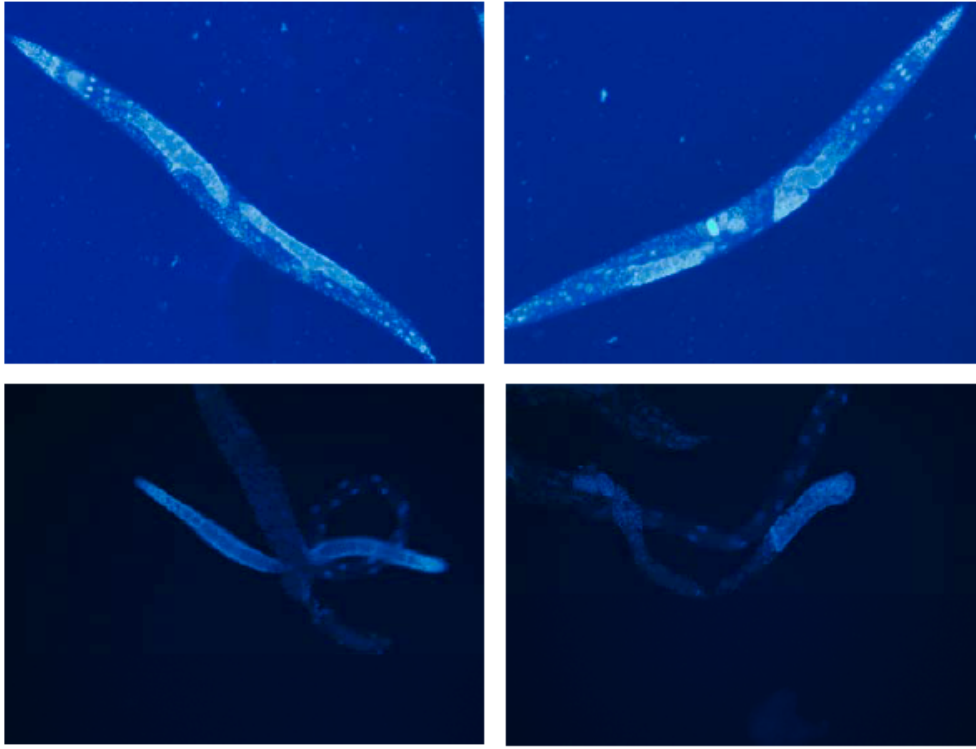

**Fig. S2. *cid-1* mutants have abnormal gonads.** DAPI staining of wild-type N2 (left) and *cid-1* mutants (right). Whole worms are shown in top panel. Bottom panels are stained dissected gonads.

**Fig. S3.**

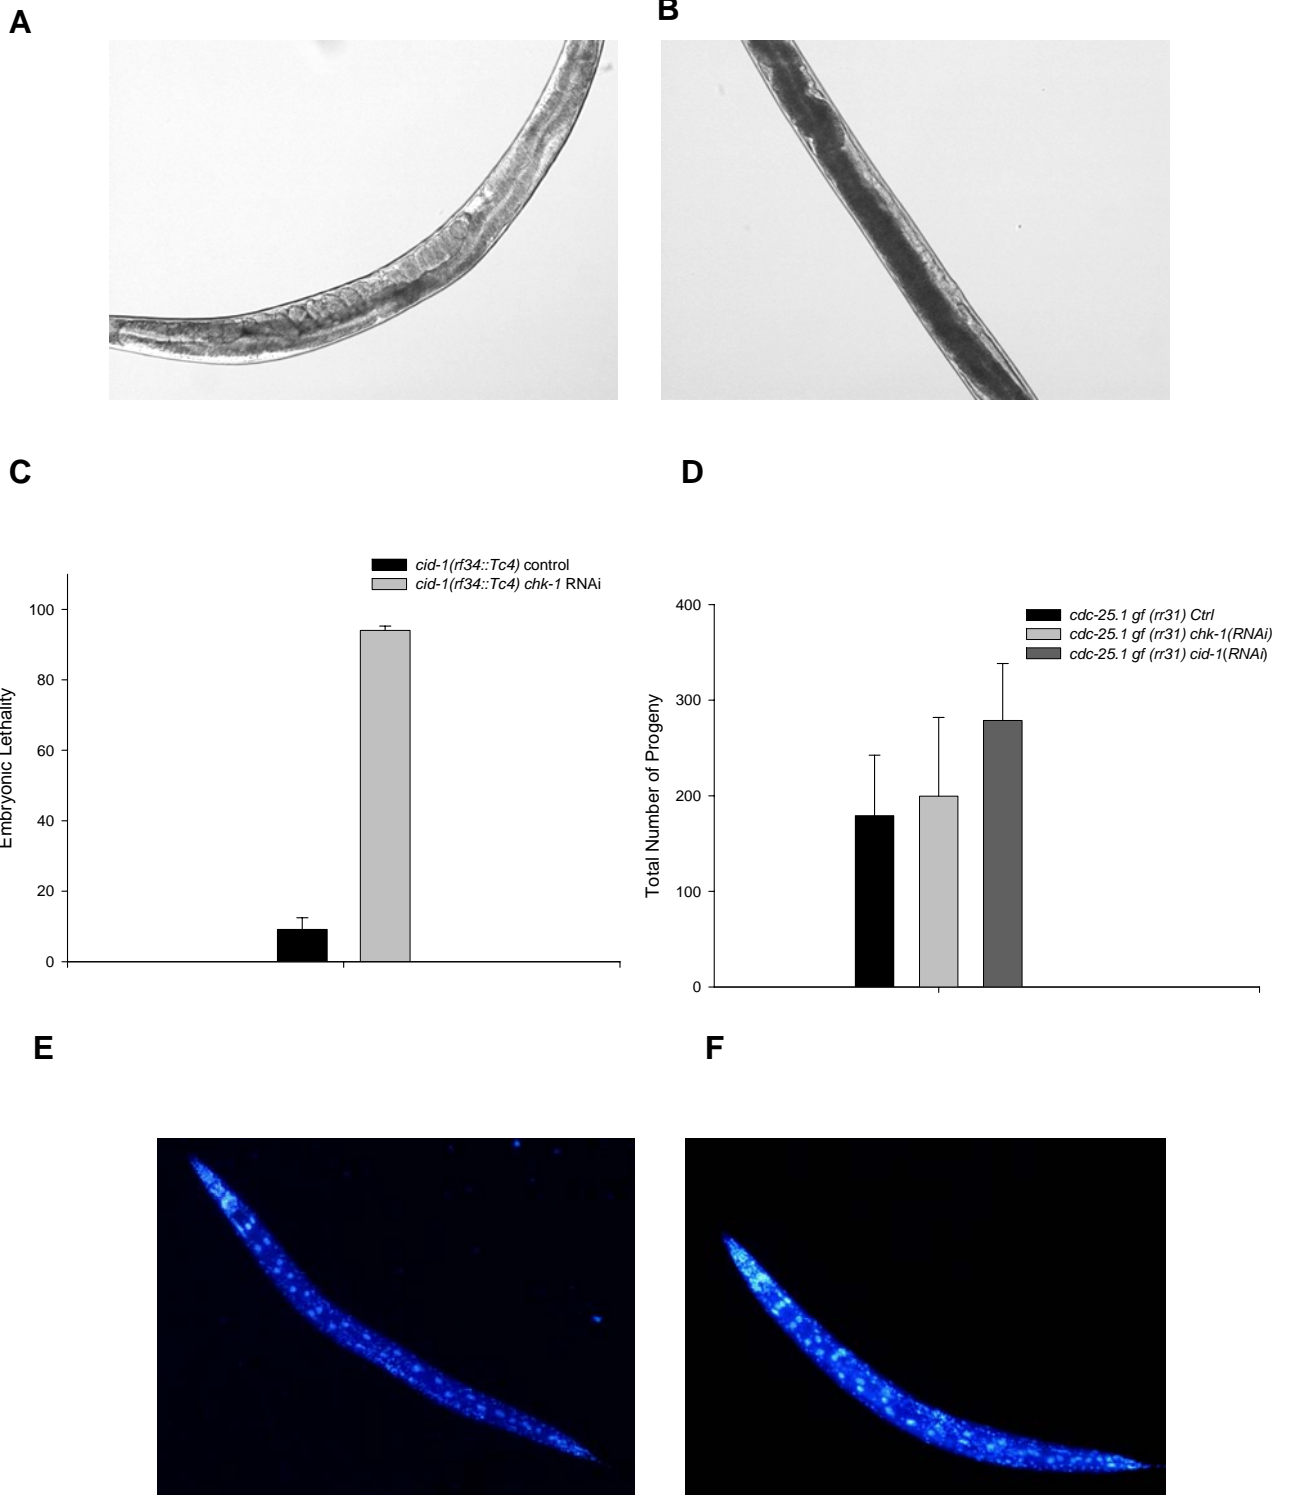



**Fig. S3. CID-1 and CHK-1 interact genetically in *C. elegans*.** (A) Three-day-old wild-type N2 controls. (B) Three-day-old *chk-1(RNAi)* worms. The *chk-1(RNAi)* worms were sterile, they lacked oocytes and embryos in their uteri. (C) Percent embryonic lethality of *cid-1(rf34::Tc4)* and *cid-1(rf34::Tc4) chk-1(RNAi)* mutants. Results obtained from two independent experiments are shown. (D) Fertility of *cdc-25.1* gf mutant worms following inactivation of *cid-1*, *chk-1* and *cdc-25.1*. (E) DAPI staining of *chk-1(RNAi)* worm. (F) DAPI staining of *cdc-25.1(RNAi)* worm.

**Fig. S4.**

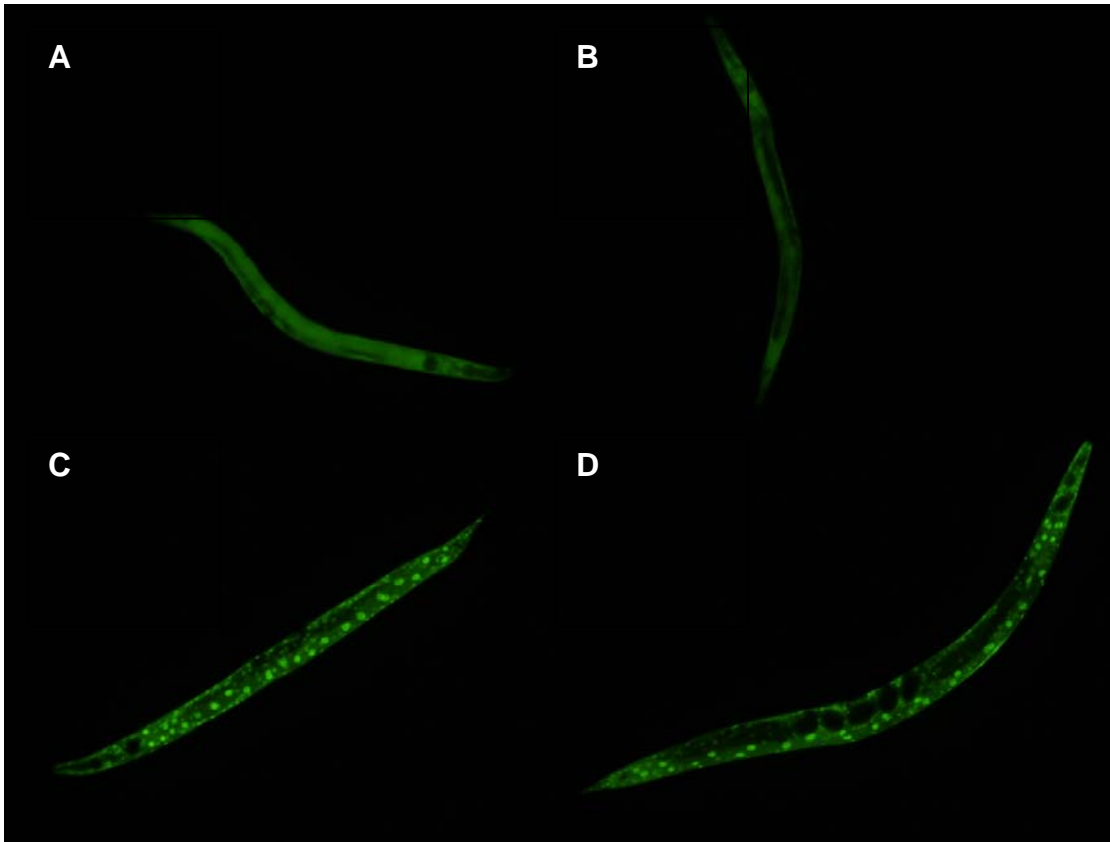

**Fig. S4. Intracellular localization of DAF-16::GFP following inactivation of CHK-1.** (A) TJ356 *chk-1(RNAi)*, no heat shock. (B) TJ356 control, no heat shock. (C) TJ356 *chk-1(RNAi)*, heat shocked. (D) TJ356 control, heat shocked.

**Table S1. Summary of longitudinal thermotolerance assays.** Log rank *P* values from comparisons between worms fed RNAi bacteria with and without the *chk-1* fragment inserted in the feeding vector are included. In each experiment the results shown were obtained from two plates each containing approximately 25 worms.

| Strain                             | Survival (min)<br>(mean $\pm$ SD) | <i>P</i> value<br>Log Rank Test |
|------------------------------------|-----------------------------------|---------------------------------|
| Experiment I                       |                                   |                                 |
| Wild-type N2                       | 360 $\pm$ 33                      |                                 |
| GL305 <i>cid-1(+/+)</i>            | 350 $\pm$ 26                      |                                 |
| GL306 <i>cid-1(+/+)</i>            | 355 $\pm$ 29                      |                                 |
| GL302 <i>cid-1(-/-)</i>            | > 432                             | <i>P</i> < 0.0001               |
| GL303 <i>cid-1(-/-)</i>            | > 433                             | <i>P</i> < 0.0001               |
| GL304 <i>cid-1(-/-)</i>            | > 431                             | <i>P</i> < 0.0001               |
| Experiment II                      |                                   |                                 |
| Wild-type N2                       | 408                               |                                 |
| Wild-type N2 <i>chk-1(RNAi)</i>    | > 442                             | <i>P</i> < 0.0001               |
| <i>daf-16(mu86)</i>                | 366 $\pm$ 50                      |                                 |
| <i>daf-16(mu86) chk-1(RNAi)</i>    | > 435                             | <i>P</i> < 0.0001               |
| Experiment III                     |                                   |                                 |
| Wild-type N2                       | 474 $\pm$ 42                      |                                 |
| Wild-type N2 <i>chk-1(RNAi)</i>    | > 571                             | <i>P</i> < 0.0001               |
| <i>daf-16(mu86)</i>                | 433 $\pm$ 64                      |                                 |
| <i>daf-16(mu86) chk-1(RNAi)</i>    | > 500                             | <i>P</i> < 0.0001               |
| Experiment IV                      |                                   |                                 |
| Wild-type N2                       | 442 $\pm$ 85                      |                                 |
| Wild-type N2 <i>chk-1(RNAi)</i>    | > 639                             | <i>P</i> < 0.0001               |
| <i>daf-16(mu86)</i>                | 418 $\pm$ 54                      |                                 |
| <i>daf-16(mu86) chk-1(RNAi)</i>    | > 528                             | <i>P</i> < 0.0001               |
| Experiment V                       |                                   |                                 |
| <i>daf-16(dr26)</i>                | 350 $\pm$ 42                      |                                 |
| <i>daf-16(dr26) chk-1(RNAi)</i>    | > 406 $\pm$ 43                    | <i>P</i> < 0.0001               |
| Experiment VI                      |                                   |                                 |
| <i>daf-12(m20)</i>                 | 490 $\pm$ 39                      |                                 |
| <i>daf-12(m20) chk-1(RNAi)</i>     | > 564                             | <i>P</i> < 0.0001               |
| Experiment VII                     |                                   |                                 |
| <i>daf-12(m20)</i>                 | 436 $\pm$ 34                      |                                 |
| <i>daf-12(m20) chk-1(RNAi)</i>     | > 467                             | <i>P</i> < 0.0001               |
| Experiment VIII                    |                                   |                                 |
| Wild-type N2                       | 412 $\pm$ 49                      |                                 |
| Wild-type N2 <i>cdc-25.1(RNAi)</i> | 478 $\pm$ 65                      | <i>P</i> < 0.0001               |
| Experiment IX                      |                                   |                                 |
| Wild-type N2                       | 520 $\pm$ 66                      |                                 |
| Wild-type N2 <i>cdc-25.1(RNAi)</i> | > 560                             | <i>P</i> < 0.0001               |
| Experiment X                       |                                   |                                 |
| Wild-type N2                       | > 438                             | <i>P</i> < 0.0001               |
| <i>cdc-25.1(rr31) I; rrls1</i>     | 423 $\pm$ 37                      |                                 |
| Experiment XI                      |                                   |                                 |
| Wild-type N2                       | > 477                             | <i>P</i> < 0.001                |
| <i>cdc-25.1(rr31) I; rrls1</i>     | 457 $\pm$ 39                      |                                 |

|                                       |             |                   |
|---------------------------------------|-------------|-------------------|
| Experiment XII                        |             |                   |
| <i>rrf-3(pk1426)</i>                  | 395 ± 37    | <i>P</i> < 0.0001 |
| <i>rrf-3(pk1426) cid-1(RNAi)</i>      | > 431       |                   |
| Experiment XIII                       |             |                   |
| <i>rrf-3(pk1426)</i>                  | 582 ± 37    | <i>P</i> < 0.0001 |
| <i>rrf-3(pk1426) cid-1(RNAi)</i>      | > 612       |                   |
| Experiment XIV                        |             |                   |
| <i>rrf-3(pk1426)</i>                  | 403 ± 42    |                   |
| <i>rrf-3(pk1426) F31C3.2 (RNAi)</i>   | 411 ± 47    | <i>P</i> = 0.3452 |
| <i>rrf-3(pk1426) F59A3.9 (RNAi)</i>   | 412 ± 44    | <i>P</i> = 0.4401 |
| <i>rrf-3(pk1426) K10D2.2 (RNAi)</i>   | 420 ± 51    | <i>P</i> = 0.0282 |
| <i>rrf-3(pk1426) K04F10.6 (RNAi)</i>  | 431 ± 46    | <i>P</i> = 0.0008 |
| Experiment XV                         |             |                   |
| <i>rrf-3(pk1426)</i>                  | 642 ± 43    |                   |
| <i>rrf-3(pk1426) F31C3.2 (RNAi)</i>   | 655 ± 25    | <i>P</i> = 0.2214 |
| <i>rrf-3(pk1426) F59A3.9 (RNAi)</i>   | 634 ± 56    | <i>P</i> = 0.0540 |
| <i>rrf-3(pk1426) K10D2.2 (RNAi)</i>   | 636 ± 58    | <i>P</i> = 0.3341 |
| <i>rrf-3(pk1426) K04F10.6 (RNAi)</i>  | 618 ± 57    | <i>P</i> < 0.0001 |
| Experiment XVI                        |             |                   |
| Wild-type N2                          | 410 ± 23    |                   |
| Wild-type N2 F31C3.2 ( <i>RNAi</i> )  | 411 ± 22    | <i>P</i> = 0.9757 |
| Wild-type N2 F59A3.9 ( <i>RNAi</i> )  | 424 ± 27    | <i>P</i> = 0.0007 |
| Wild-type N2 K10D2.2 ( <i>RNAi</i> )  | 430 ± 19    | <i>P</i> < 0.0001 |
| Wild-type N2 K04F10.6 ( <i>RNAi</i> ) | 407 ± 24    | <i>P</i> = 0.4645 |
| Experiment XVII                       |             |                   |
| <i>eat-2(ad1113)</i>                  | 435 ± 33    |                   |
| <i>eat-2(ad11130) chk-1(RNAi)</i>     | 548 ± 44    | <i>P</i> < 0.0001 |
| Experiment XVIII                      |             |                   |
| Wild-type N2                          | 467 ± 43    |                   |
| GL311 <i>cdc-25.3 (-/-)</i>           | > 491       | <i>P</i> < 0.0001 |
| GL312 <i>cdc-25.3 (+/+)</i>           | 462 ± 44    | <i>P</i> = 0.08   |
| Experiment XIX                        |             |                   |
| Wild-type N2                          | 375 ± 37    |                   |
| GL313 <i>cdc-25.3 (-/-)</i>           | > 521       | <i>P</i> < 0.0001 |
| GL314 <i>cdc-25.3 (+/+)</i>           | 416 ± 44    | <i>P</i> < 0.0001 |
| Experiment XX                         |             |                   |
| <i>rrf-3(pk1426)</i>                  | 469 ± 33    |                   |
| <i>rrf-3(pk1426)cdc-25.3(RNAi)</i>    | > 498 ± 35  | <i>P</i> < 0.0001 |
| Experiment XXI                        |             |                   |
| <i>rrf-3(pk1426)</i>                  | 478 ± 109   |                   |
| <i>rrf-3(pk1426)cdc-25.3(RNAi)</i>    | > 564 ± 100 | <i>P</i> < 0.0001 |
| Experiment XXII                       |             |                   |
| <i>rrf-3(pk1426)</i>                  | 545 ± 132   |                   |
| <i>rrf-3(pk1426)cdc-25.2(RNAi)</i>    | 648 ± 119   | <i>P</i> = 0.0057 |
| <i>rrf-3(pk1426)cdc-25.4(RNAi)</i>    | 569 ± 106   | <i>P</i> = 0.5609 |

**Table S2 Development time and fertility of *cid-1(rf34::Tc4)* mutant worms.**

Fertility is the total number of progeny (mean  $\pm$  SD) through out the reproductive period. Student's t test *P* values from comparison to wild-type N2. (+/+) indicates wild-type *cid-1* gene. *n*, number of worms.

| Strain                           | Time to all individuals were egg laying (h) | Fertility    | <i>P</i>           | <i>n</i> |
|----------------------------------|---------------------------------------------|--------------|--------------------|----------|
| Wild-type N2 (+/+)               | <73                                         | 296 $\pm$ 49 |                    | 11       |
| GL305 <i>cid-1</i> (+/+)         | <73                                         | 311 $\pm$ 29 | <i>P</i> = 0.35    | 13       |
| GL302 <i>cid-1(rf34::Tc4)</i>    | > 97                                        | 93 $\pm$ 15  | <i>P</i> << 0.0001 | 10       |
| <i>rrf-3(pk1426)</i>             | <73                                         | 138 $\pm$ 25 |                    | 8        |
| <i>rrf-3(pk1426) cid-1(RNAi)</i> | <73                                         | 63 $\pm$ 23  | <i>P</i> << 0.0001 | 10       |

**Table S3. Summary of life-span assays.** Log-rank *P* values from comparisons between worms fed RNAi bacteria with and without the indicated fragment inserted in the feeding vector. *n*, number of deaths recorded.

| Strain                          | Survival (mean $\pm$ SD days) | <i>n</i> | Log-rank test <i>P</i> value | Temp  |
|---------------------------------|-------------------------------|----------|------------------------------|-------|
| Experiment I                    |                               |          |                              |       |
| Wild-type N2                    | 15.3 $\pm$ 3.8                | 52       |                              | 25 °C |
| Wild-type N2 <i>chk-1(RNAi)</i> | 17.1 $\pm$ 3.6                | 89       | <i>P</i> = 0.0102            |       |
| Experiment II                   |                               |          |                              |       |
| Wild-type N2                    | 13.9 $\pm$ 3.7                | 66       |                              | 25 °C |
| Wild-type N2 <i>chk-1(RNAi)</i> | 17.2 $\pm$ 3.3                | 118      | <i>P</i> < 0.0001            |       |
| <i>daf-16(mu86)</i>             | 12.8 $\pm$ 2.6                | 115      |                              |       |
| <i>daf-16(mu86) chk-1(RNAi)</i> | 14.5 $\pm$ 2.4                | 110      | <i>P</i> < 0.0001            |       |
| Experiment III                  |                               |          |                              |       |
| Wild-type N2                    | 14.6 $\pm$ 3.1                | 122      |                              | 25 °C |
| Wild-type N2 <i>chk-1(RNAi)</i> | 18.5 $\pm$ 3.4                | 142      | <i>P</i> < 0.0001            |       |
| <i>daf-12(m20)</i>              | 14.1 $\pm$ 2.8                | 131      |                              |       |
| <i>daf-12(m20) chk-1(RNAi)</i>  | 16.2 $\pm$ 3.8                | 142      | <i>P</i> < 0.0001            |       |
| Experiment IV                   |                               |          |                              |       |
| <i>daf-12(m20)</i>              | 14.8 $\pm$ 4.1                | 145      |                              | 25 °C |
| <i>daf-12(m20) chk-1(RNAi)</i>  | 19.2 $\pm$ 5.6                | 177      | <i>P</i> < 0.0001            |       |
| Experiment V                    |                               |          |                              |       |
| <i>daf-16(mu86)</i>             | 12.3 $\pm$ 2.9                | 155      |                              | 25 °C |
| <i>daf-16(mu86) chk-1(RNAi)</i> | 13.0 $\pm$ 2.4                | 177      | <i>P</i> = 0.032             |       |
| Experiment VI                   |                               |          |                              |       |
| Wild-type N2                    | 19.7 $\pm$ 4.8                | 114      |                              | 20 °C |
| Wild-type N2 <i>chk-1(RNAi)</i> | 22.4 $\pm$ 6.8                | 117      | <i>P</i> < 0.0001            |       |
| <i>daf-16(mu86)</i>             | 16.1 $\pm$ 3.3                | 140      |                              |       |
| <i>daf-16(mu86) chk-1(RNAi)</i> | 16.1 $\pm$ 2.3                | 112      | <i>P</i> = 0.280             |       |
| <i>daf-12(m20)</i>              | 18.7 $\pm$ 4.8                | 123      |                              |       |
| <i>daf-12(m20) chk-1(RNAi)</i>  | 19.5 $\pm$ 5.3                | 168      | <i>P</i> = 0.1250            |       |
| Experiment VII                  |                               |          |                              |       |
| Wild-type N2                    | 18.1 $\pm$ 5.6                | 151      |                              | 20 °C |

|                                    |                                      |     |              |       |
|------------------------------------|--------------------------------------|-----|--------------|-------|
| Wild-type N2 <i>chk-1(RNAi)</i>    | 20.6 ± 5.4                           | 99  | $P < 0.0001$ |       |
| <i>daf-16(mu86)</i>                | 15.1 ± 3.1                           | 181 |              |       |
| <i>daf-16(mu86) chk-1(RNAi)</i>    | 15.1 ± 2.1                           | 96  | $P = 0.090$  |       |
| <i>daf-12(m20)</i>                 | 20.8 ± 4.8                           | 178 |              |       |
| <i>daf-12(m20) chk-1(RNAi)</i>     | 20.8 ± 5.0                           | 136 | $P = 0.3774$ |       |
| Experiment VIII                    |                                      |     |              |       |
| <i>daf-2(e1368)</i>                | 26.2 ± 7.0                           | 70  |              |       |
| <i>daf-2(e1368) chk-1(RNAi)</i>    | 34.5 ± 9.8                           | 112 | $P < 0.0001$ | 20 °C |
| Experiment IX                      |                                      |     |              |       |
| Wild-type N2                       | 14.9 ± 4.3                           | 82  |              | 25 °C |
| Wild-type N2 <i>cdc-25.1(RNAi)</i> | 17.6 ± 6.1                           | 116 | $P = 0.0022$ |       |
| Experiment X                       |                                      |     |              |       |
| Wild-type N2                       | 18.6 ± 7.3                           | 81  | NS           | 20 °C |
| Wild-type N2 <i>cdc-25.1(RNAi)</i> | 18.2 ± 7.5                           | 110 |              |       |
| Experiment XI                      |                                      |     |              |       |
| Wild-type N2                       | 21.9 ± 7.5                           | 31  | $P = 0.08$   | 20 °C |
| Wild-type N2 <i>cdc-25.1(RNAi)</i> | 24.9 ± 8.9                           | 89  |              |       |
| <i>daf-2(e1368)</i>                | 31.2 ± 6.7 (40.0 ± 2.0) <sup>b</sup> | 72  | $P = 0.39$   |       |
| <i>daf-2(e1368) cdc-25.1(RNAi)</i> | 28.4 ± 12.0 (46.5 ± 3.4)*            | 76  |              |       |
| Experiment XII                     |                                      |     |              |       |
| Wild-type N2                       | 23.7 ± 7.8                           | 54  | $P = 0.0004$ | 20 °C |
| Wild-type N2 <i>cdc-25.1(RNAi)</i> | 27.8 ± 10.8                          | 166 |              |       |
| <i>daf-2(e1368)</i>                | 31.0 ± 7.7 (41.2 ± 3.4)*             | 89  | $P = 0.1123$ |       |
| <i>daf-2(e1368) cdc-25.1(RNAi)</i> | 32.1 ± 10.8 (48.1 ± 3.0)*            | 166 |              |       |
| Experiment XIII                    |                                      |     |              |       |
| Wild-type N2                       | 22.2 ± 6.9                           | 79  | $P = 0.084$  | 20 °C |
| <i>cdc-25.1(rr31) l; rrls1</i>     | 19.1 ± 8.2                           | 79  |              |       |
| Experiment XIV                     |                                      |     |              |       |
| Wild-type N2                       | 22.5 ± 6.1                           | 32  | $P < 0.0003$ | 20 °C |
| <i>cdc-25.1(rr31) l; rrls1</i>     | 18.2 ± 4.9                           | 71  |              |       |
| Experiment XV                      |                                      |     |              |       |
| Wild-type N2                       | 22.0 ± 3.6                           | 38  | $P < 0.0001$ | 20 °C |
| <i>cdc-25.1(rr31) l; rrls1</i>     | 16.8 ± 4.1                           | 30  |              |       |
| Experiment XVI                     |                                      |     |              |       |
| Wild-type N2                       | 19.2 ± 5.6                           | 48  | $P < 0.0001$ | 20 °C |
| <i>cdc-25.1(rr31) l; rrls1</i>     | 12.8 ± 2.5                           | 55  |              |       |
| Experiment XVII                    |                                      |     |              |       |
| Wild-type N2                       | 13.2 ± 4.5                           | 80  | $P = 0.05$   | 25 °C |
| <i>cdc-25.1(rr31) l; rrls1</i>     | 12.3 ± 3.7                           | 96  |              |       |
| Experiment XVIII                   |                                      |     |              |       |
| Wild-type N2                       | 14.8 ± 4.2                           | 52  | $P < 0.0001$ | 25 °C |
| <i>cdc-25.3(ok358)</i>             | 20.3 ± 4.3                           | 72  |              |       |
| Experiment XIX                     |                                      |     |              |       |

|                                        |                        |     |              |       |
|----------------------------------------|------------------------|-----|--------------|-------|
| Wild-type N2                           | 12.2 ± 4.3             | 46  | $P < 0.0001$ | 25 °C |
| <i>cdc-25.3(ok358)</i>                 | 20.2 ± 6.2             | 33  |              |       |
| Experiment XX                          |                        |     |              |       |
| <i>rrf-3(pk1426)</i>                   | 22.8 ± 5.0             | 67  | $P = 0.0029$ | 20 °C |
| <i>rrf-3(pk1426)cdc-25.3(RNAi)</i>     | 24.0 ± 7.4             | 81  |              |       |
| Experiment XXI                         |                        |     |              |       |
| <i>rrf-3(pk1426)</i>                   | 19.2 ± 5.8             | 95  | $P < 0.0001$ | 20 °C |
| <i>rrf-3(pk1426) cid-1(RNAi)</i>       | 23.3 ± 5.8             | 110 |              |       |
| Experiment XXII                        |                        |     |              |       |
| <i>rrf-3(pk1426)</i>                   | 21.4 ± 5.8             | 56  | $P < 0.0001$ | 20 °C |
| <i>rrf-3(pk1426) cid-1(RNAi)</i>       | 26.1 ± 5.6             | 39  |              |       |
| Experiment XXIII                       |                        |     |              |       |
| <i>rrf-3(pk1426)</i>                   | 14.2 ± 3.5             | 77  | $P = 0.0033$ | 25 °C |
| <i>rrf-3(pk1426) K104F10.6 (RNAi)</i>  | 16.1 ± 4.5             | 88  |              |       |
| <i>rrf-3(pk1426) F31C3.2 (RNAi)</i>    | 14.2 ± 3.4             | 97  |              |       |
| <i>rrf-3(pk1426) F59A3.9 (RNAi)</i>    | 15.0 ± 4.1             | 105 |              |       |
| Experiment XXIV                        |                        |     |              |       |
| <i>rrf-3(pk1426)</i>                   | 14.3 ± 4.0             | 115 | $P = 0.8510$ | 25 °C |
| <i>rrf-3(pk1426) K104F10.6 (RNAi)</i>  | 14.7 ± 4.4             | 127 |              |       |
| <i>rrf-3(pk1426) F31C3.2 (RNAi)</i>    | 15.6 ± 3.7             | 116 |              |       |
| <i>rrf-3(pk1426) F59A3.9 (RNAi)</i>    | 14.0 ± 3.8             | 120 |              |       |
| Experiment XXV                         |                        |     |              |       |
| Wild-type N2                           | 21.9 ± 4.7             | 62  | $P = 0.0311$ | 20 °C |
| Wild-type N2 K104F10.6 (RNAi)          | 23.6 ± 5.1             | 71  |              |       |
| Wild-type N2 F31C3.2 (RNAi)            | 25.6 ± 6.0             | 85  |              |       |
| Wild-type N2 F59A3.9 (RNAi)            | 21.3 ± 4.2             | 85  |              |       |
| Wild-type N2 K10D2.2 (RNAi)            | 23.1 ± 4.2             | 83  |              |       |
| Experiment XXVI                        |                        |     |              |       |
| Wild-type N2                           | 18.9 ± 3.0             | 87  | $P = 0.4708$ | 20 °C |
| Wild-type N2 K104F10.6 (RNAi)          | 19.2 ± 3.0             | 87  |              |       |
| Wild-type N2 F31C3.2 (RNAi)            | 21.0 ± 3.4             | 113 |              |       |
| Wild-type N2 F59A3.9 (RNAi)            | 19.8 ± 4.1             | 70  |              |       |
| Experiment XXVII                       |                        |     |              |       |
| Wild-type N2                           | 16.4 ± 2.5             | 86  | $P < 0.0001$ | 25 °C |
| Wild-type N2 K104F10.6 (RNAi)          | 18.0 ± 1.9             | 82  |              |       |
| Wild-type N2 F31C3.2 (RNAi)            | 17.6 ± 2.1             | 62  |              |       |
| Wild-type N2 F59A3.9 (RNAi)            | 17.3 ± 2.4             | 92  |              |       |
| Wild-type N2 K10D2.2 (RNAi)            | 18.2 ± 1.7             | 71  |              |       |
| Experiment XXVIII                      |                        |     |              |       |
| Wild-type N2                           | 14.7 ± 3.2 (19 ± 1)*   | 90  | $P < 0.0001$ | 25 °C |
| Wild-type N2 <i>hsp-4(RNAi)</i> Eggs   | 11.5 ± 2.3 (14 ± 1)*   | 67  |              |       |
| Wild-type N2 <i>hsp-4(RNAi)</i> Adults | 13.5 ± 2.9 (17 ± 0.4)* | 116 |              |       |

\*Maximum life span.

**References**

- S1. S. Brenner, *Genetics* **77**, 71 (1974).
- S2. G. A. Walker, D. W. Walker, G. J. Lithgow, *Ann. N.Y. Acad. Sci.* **851**, 444 (1998).
- S3. M. J. Munoz, D. L. Riddle, *Genetics* **163**, 171 (2003).
- S4. G. J. Lithgow, T. M. White, S. Melov, T. E. Johnson, *Proc. Natl. Acad. Sci. U.S.A.* **92**, 7540 (1995).
- S5. M. S. Gill, A. Olsen, J. N. Sampayo, G. J. Lithgow, *Free Radic. Biol. Med.* **35**, 558 (2003).
- S6. O. Hobert, *Biotechniques* **32**, 728 (2002).
- S7. L. Timmons, D. L. Court, A. Fire, *Gene* **263**, 103 (2001).
- S8. F. Simmer *et al.*, *Curr. Biol.* **12**, 1317 (2002).
